# Supplementary material for: Precise determination of graphene functionalization by in situ Raman spectroscopy
Source: PubMed Central journal article supplement (PMC5424145; doi:10.1038/ncomms15192), 2017-05-08
Supplement: ncomms15192-s1.pdf [file ncomms15192-s1.pdf]

## Supplementary Information

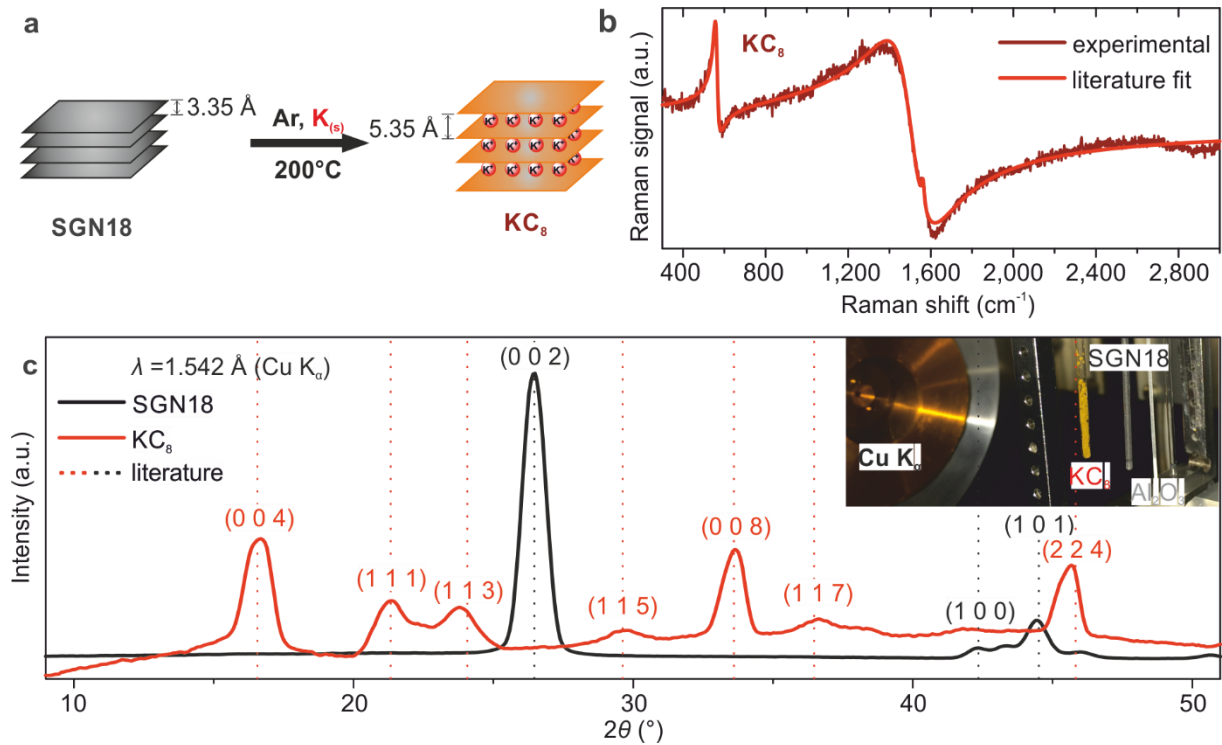

**Supplementary Figure 1: X-ray diffraction analysis of the potassium intercalated graphite starting material.** a) Synthesis of the stage I GIC by potassium intercalation into the SGN18 graphite. b) *In situ* Raman spectrum of KC<sub>8</sub> indicating saturation doping. c) XRD pattern of pristine graphite (black) and KC<sub>8</sub>. The interlayer distance between the sheets was determined to increase from 3.35 Å (graphite) to 5.35 Å in KC<sub>8</sub>. The black dashed lines are literature values for the position of reflections of graphite,<sup>1</sup> the orange dashed lines for KC<sub>8</sub> (full orthorhombic model)<sup>2</sup>.

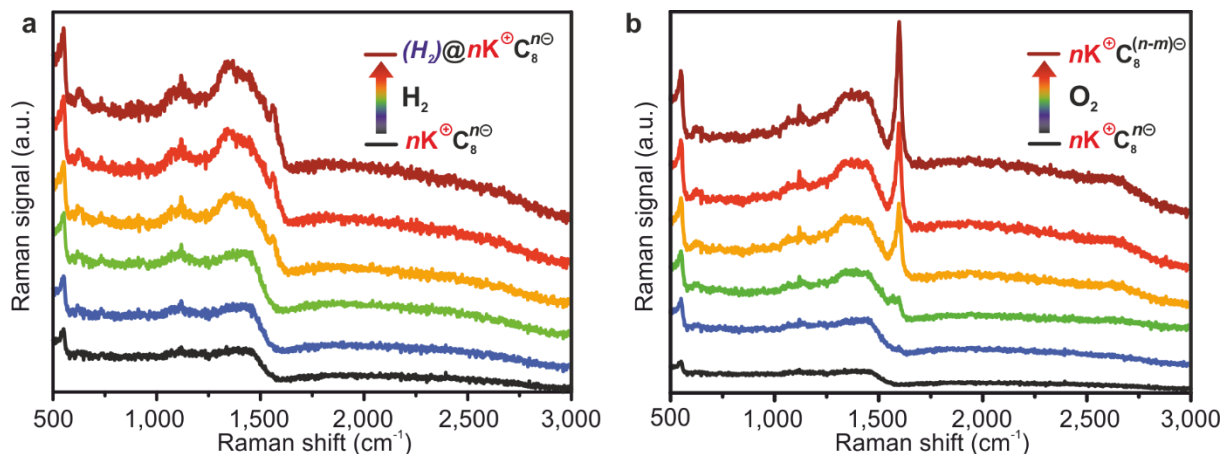

**Supplementary Figure 2: Hydrogen and oxygen addition to GICs.** *In situ* Raman spectroscopy of  $\text{KC}_8$  exclusively exposed to a) molecular hydrogen  $\text{H}_2$  and b) molecular oxygen  $\text{O}_2$ . The Raman spectra indicate a) intercalation of molecular hydrogen without covalent addend binding and b) oxidation of the GIC in the case of its exposure towards oxygen, respectively.

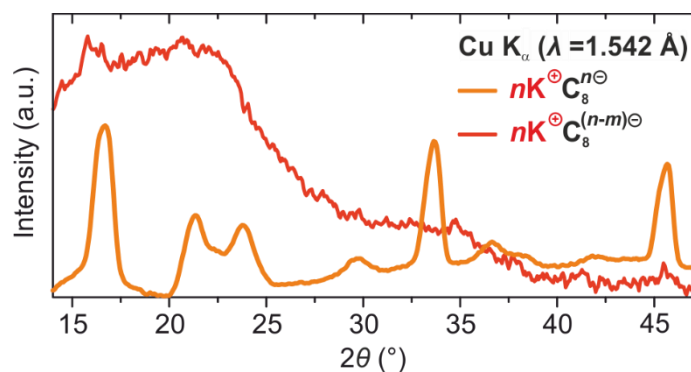

**Supplementary Figure 3: XRD of oxygen treated GIC.** The characteristic XRD pattern of stage I GIC  $\text{KC}_8$  under inert conditions (orange) is compared with the pattern of the material obtained after exposure to oxygen (c.f. **Figure 2a-b**). In the latter case, no crystallinity is detected. The X-ray pattern predominantly shows amorphous carbon, with some tiny reflections indicating relicts of intercalated potassium with approximately 5.6 Å lattice distance. It has to be noted, that a small unreacted fraction of  $\text{KC}_8$  in the bulk sample can be identified by the small reflections on top of the broad reflection in the short range of  $2\theta$ .

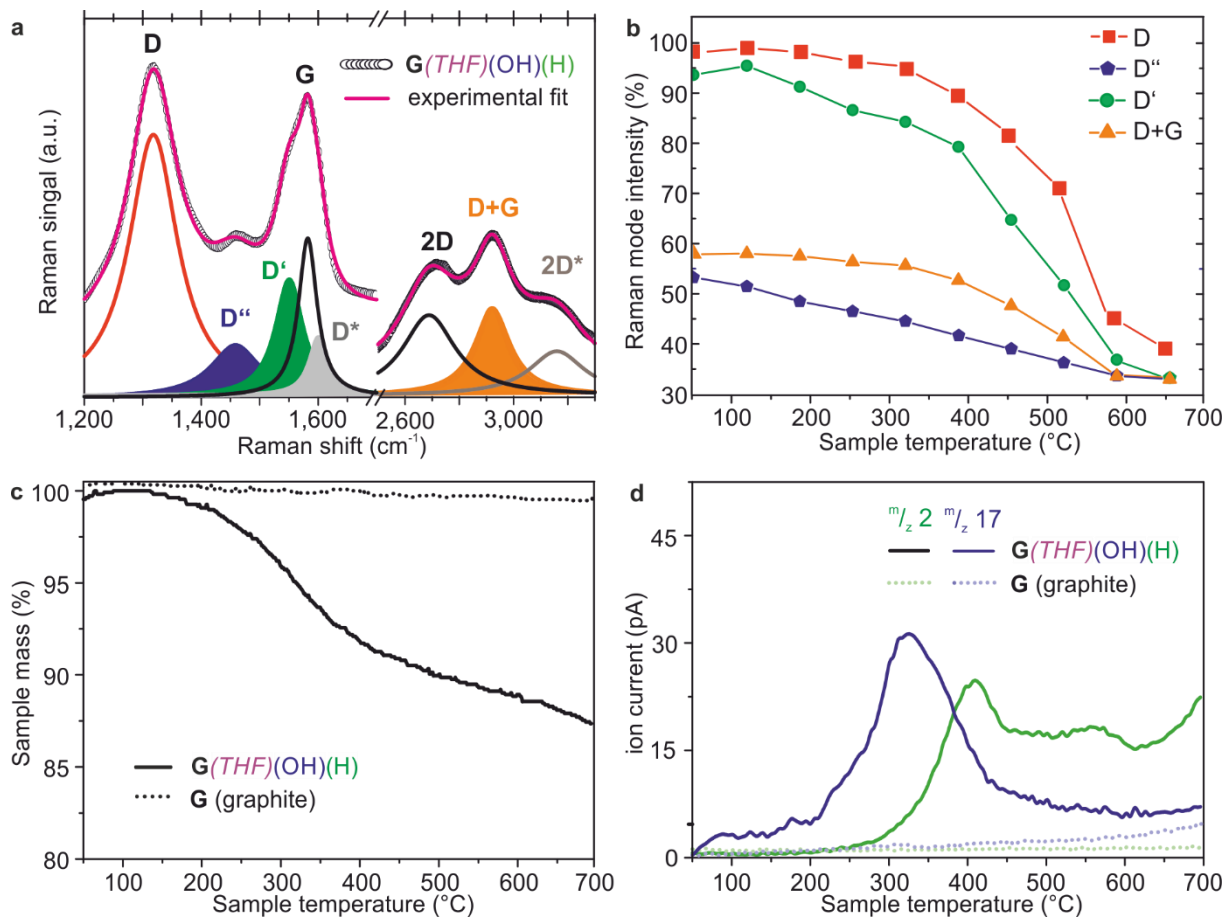

**Supplementary Figure 4: TG-MS and TDRS analysis of the sample in Fig. 3.** a) Raman spectrum of  $G(THF)(OH)(H)$  with respective fitted modes. b) Evolution of main Raman modes upon TDRS analysis. c) Weight loss curve of pristine SGN18 (-0.1 %) and  $G(THF)(OH)(H)$  (-15 %) by annealing under inert gas atmosphere (He) to 700 °C. d) Correlating MS traces for  $m/z$  2 ( $H_2$ ) and  $m/z$  17 (OH). The TG-MS coupling proves the detachment of hydroxyl (200-400 °C) and hydrogen (350-600 °C) moieties from the sample upon heating.

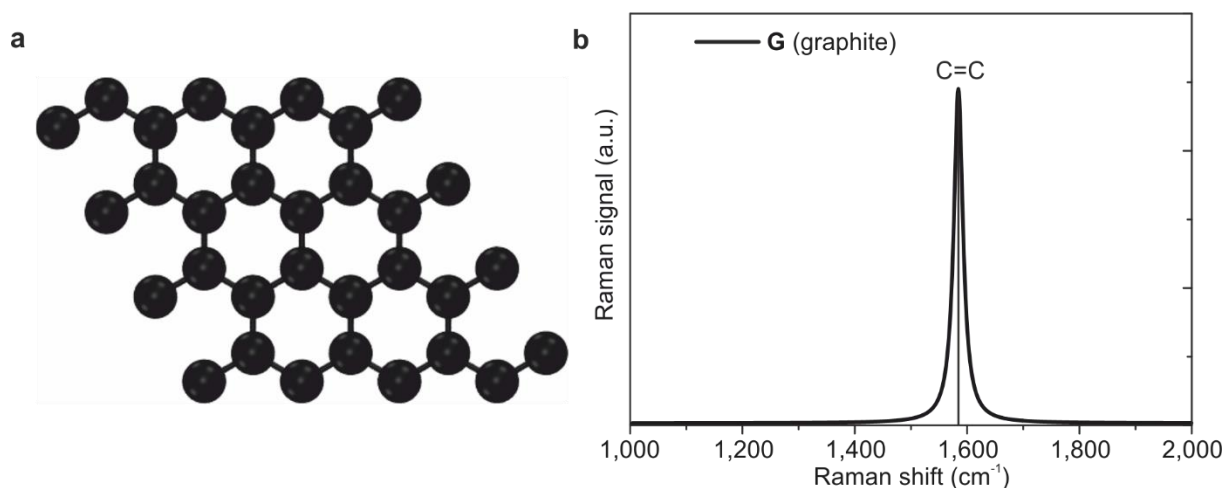

**Supplementary Figure 5: Calculated reference spectrum of graphene.** a) Reference pristine graphene (**G**) unit cell. b) Respective calculated Raman spectrum for pristine graphene **G** without defects.

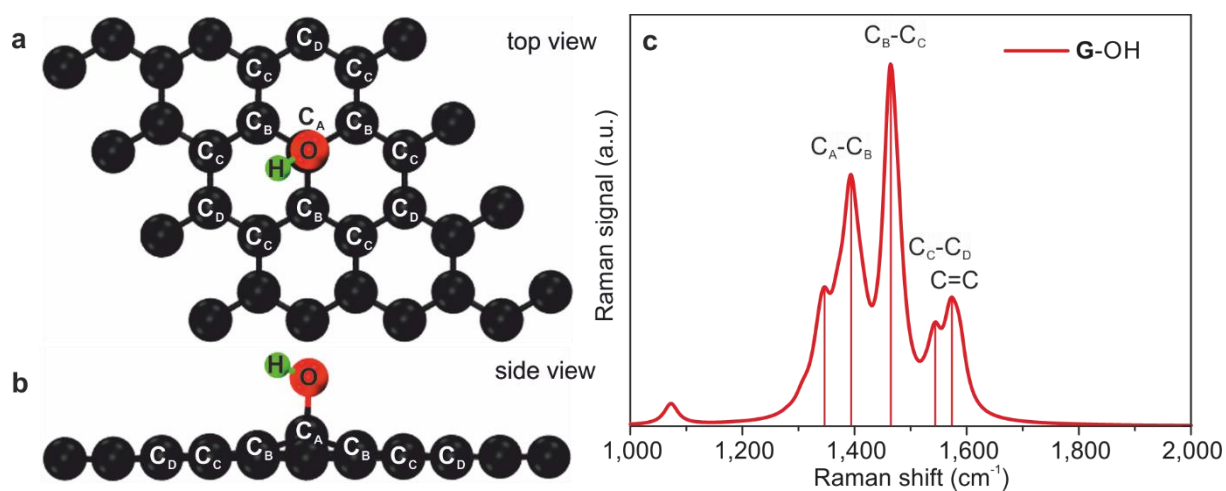

**Supplementary Figure 6: Identification and assignment of new Raman bands in G-OH.** Unit cell for the simulation of hydroxylated graphene (**G-OH**). The picture shows the optimized geometric structure. a) top view indicating the basal C atom assignment surrounding the  $sp^3$  carbon atom functionalized by -OH. b) Side view indicating the shift in z-direction due to the  $sp^3$  hybridization. c) Calculated Raman spectrum indicating the typical fingerprint originating from the lattice carbon atoms influenced by the  $sp^3$  functionalization with hydroxyl groups. For the detailed information on vibrational frequencies and a visualization of the modes see Supplementary Tables 1 and 2.

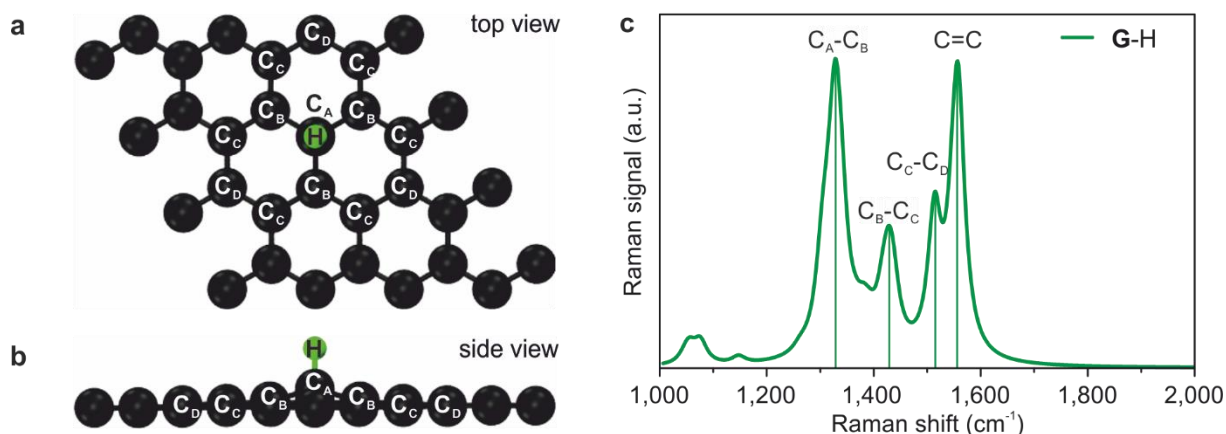

**Supplementary Figure 7: Identification and assignment of new Raman bands in G-H.** Unit cell for the simulation of G-H. The picture shows the geometrical optimized structure from a) top view indicating the basal C atom assignment surrounding the  $sp^3$  carbon atom functionalized by -H. b) Side view indicating the shift in z-direction due to the  $sp^3$  hybridization. c) Calculated Raman spectrum indicating the typical fingerprint originating from the lattice carbon atoms influenced by the  $sp^3$  functionalization with hydrogen atoms. For the detailed information on vibrational frequencies and a visualization of the modes see Supplementary Tables 1 and 2.

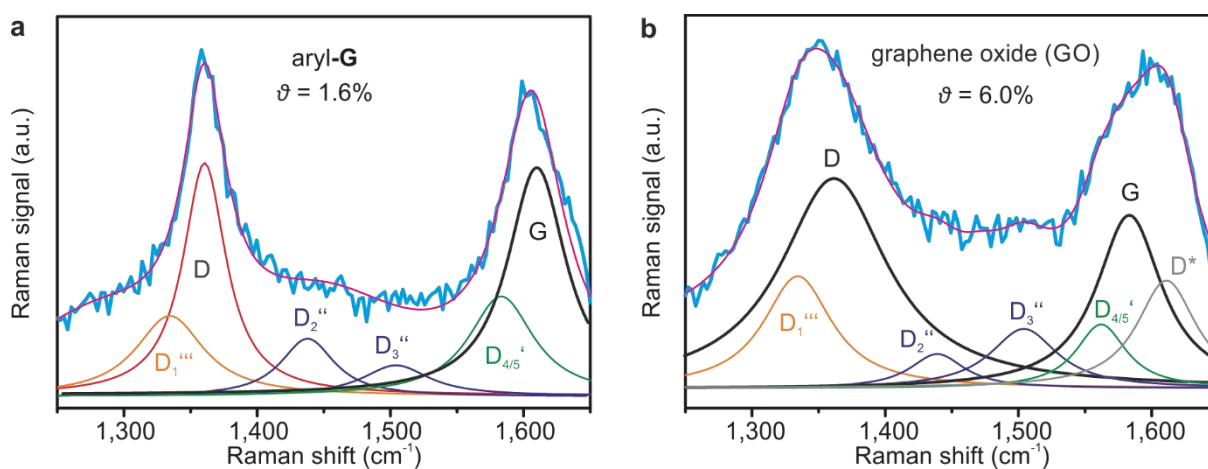

**Supplementary Figure 8: Bulk Raman spectra of functionalised graphene derivatives.** Fitted Raman spectra for single layers of a) arylated graphene and b) graphene oxide.<sup>6</sup> The fitting was carried out similar to Figure 4 in the manuscript. The identified components of the spectrum perfectly match the obtained Raman modes and can therefore be correlated. Note that for aryl-G and GO, the second D'' mode can be identified.

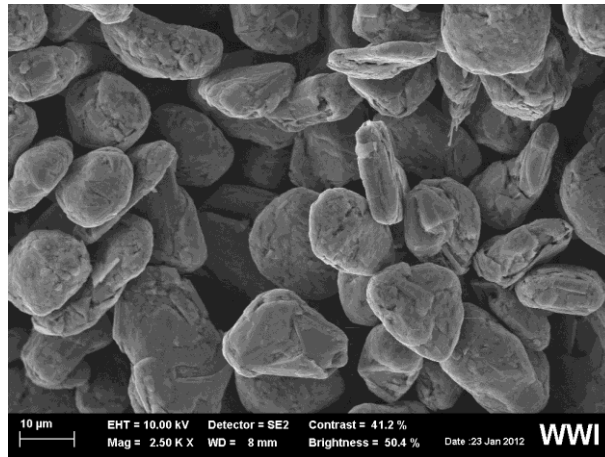

**Supplementary Figure 9: SEM image of pristine material.** SGN18 graphite under 2,500x magnification.

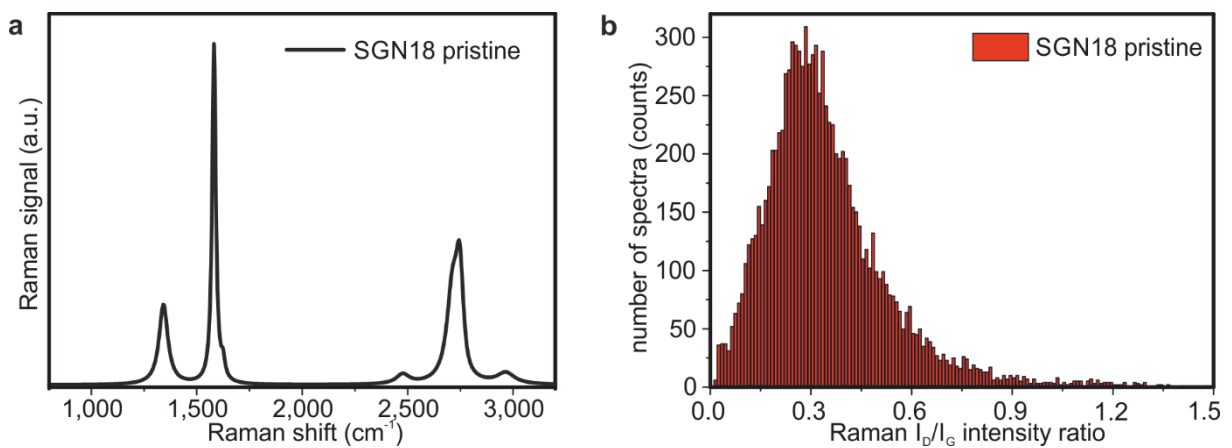

**Supplementary Figure 10: SRS analysis of the pristine graphite material.** SGN18 serving as reference. 10,000 spectra were recorded leading to a) the mean Raman signature and b) an I<sub>D</sub>/I<sub>G</sub> intensity distribution given in the histogram right.

Supplementary Table 1: Overview of experimental and calculated data.

a) Calculated data

| graphene derivative | $\gamma$ ( $C_B C_A C_B$ ) | $\Delta z$ / Å | C=C [cm <sup>-1</sup> ] | C <sub>C</sub> -C <sub>D</sub> [cm <sup>-1</sup> ] | C <sub>B</sub> -C <sub>C</sub> [cm <sup>-1</sup> ] | C <sub>A</sub> -C <sub>B</sub> [cm <sup>-1</sup> ] | C-X [cm <sup>-1</sup> ] |
|---------------------|----------------------------|----------------|-------------------------|----------------------------------------------------|----------------------------------------------------|----------------------------------------------------|-------------------------|
| G                   | 120°                       | /              | 1,572                   | /                                                  | /                                                  | /                                                  | /                       |
| G-H                 | 114.5°                     | 0.46           | 1,574                   | 1,427                                              | 1,348                                              | 1,324                                              | 2,641                   |
| G-OH                | 113.7°                     | 0.60           | 1,576                   | 1,464                                              | 1,393                                              | 1,346                                              | 3,614                   |

b) Experimental Data

| <i>in situ</i> |  |  | G-mode [cm <sup>-1</sup> ] | D <sub>5</sub> / D <sub>4</sub> [cm <sup>-1</sup> ] | D <sub>3</sub> / D <sub>2</sub> [cm <sup>-1</sup> ] | D <sub>1</sub> [cm <sup>-1</sup> ] |  |
|----------------|--|--|----------------------------|-----------------------------------------------------|-----------------------------------------------------|------------------------------------|--|
|                |  |  | 1,575                      | 1,559/1,518                                         | 1,442/1,483                                         | 1,325                              |  |
| workup         |  |  | G-mode [cm <sup>-1</sup> ] | D' [cm <sup>-1</sup> ]                              | D'' [cm <sup>-1</sup> ]                             | D''' [cm <sup>-1</sup> ]           |  |
|                |  |  | 1,576                      | 1,550                                               | 1,458                                               | 1,325                              |  |

c) Overview Raman Mode Labeling

| <i>calculation</i> |  |  | C=C    | C <sub>C</sub> -C <sub>D</sub>  | C <sub>B</sub> -C <sub>C</sub>  | C <sub>A</sub> -C <sub>B</sub> |  |
|--------------------|--|--|--------|---------------------------------|---------------------------------|--------------------------------|--|
| <i>in situ</i>     |  |  | G-mode | D <sub>5</sub> / D <sub>4</sub> | D <sub>3</sub> / D <sub>2</sub> | D <sub>1</sub>                 |  |
| workup             |  |  | G-mode | D'                              | D''                             | D'''                           |  |

a) Calculated data for pristine graphene **G**, hydrogenated **G-H** and hydroxylated **G-OH** functionalized derivatives (methods see ESI). The values indicate the change in dihedral angle  $\gamma$ , the shift of the functionalized  $sp^3$  carbon atom out of the basal plane  $\Delta z$  as well as the calculated phonon frequencies for the lattice carbon atoms influenced by the introduced addend. b) Experimental data of *in situ* functionalized KC<sub>8</sub> (see Figure 1) and of the functionalized graphene obtained after workup (see Figure 3). c) Correlation of the Raman mode labelling used for the *in situ* functionalized material (D<sub>1</sub>-D<sub>5</sub>), calculated phonon frequencies (C<sub>A</sub>-C<sub>B</sub>, C<sub>B</sub>-C<sub>C</sub>, and C<sub>C</sub>-C<sub>D</sub>), and of the material obtained after workup (D', D'', and D''').

Supplementary Table 2: Calculated vibrational modes.

| Graphene derivative            | G-H                                                                                 | G-OH                                                                                 | Description of the mode                    |
|--------------------------------|-------------------------------------------------------------------------------------|--------------------------------------------------------------------------------------|--------------------------------------------|
| C=C                            | 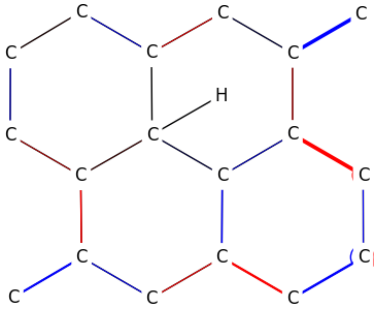   |    | symmetric framework stretching             |
| C <sub>C</sub> -C <sub>D</sub> |   |   | symmetric framework stretching             |
| C <sub>B</sub> -C <sub>C</sub> |  |  | asymmetric / symmetric C <sub>2</sub> mode |
| C <sub>A</sub> -C <sub>B</sub> |  |  | asymmetric stretching mode                 |



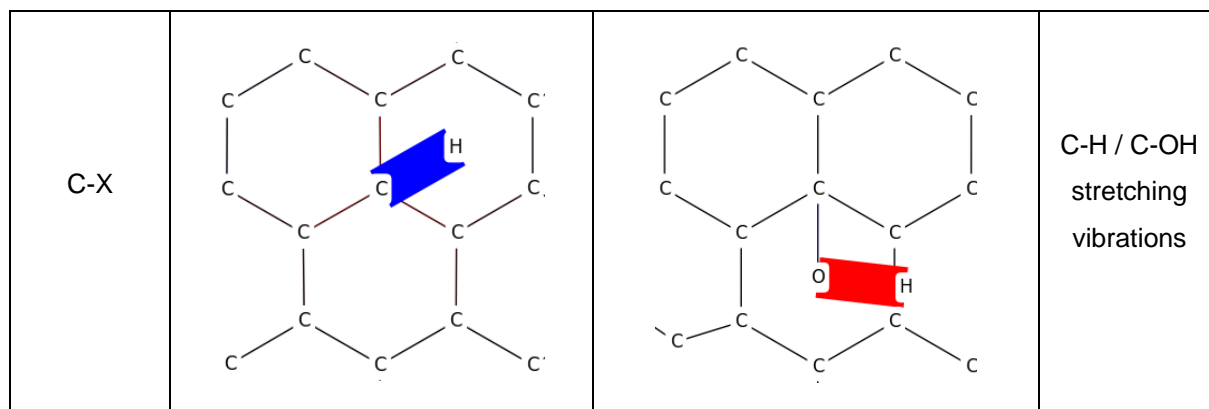

Simplified visualization of calculated vibrational modes using QVibplot<sup>3</sup>. The thickness of the lines representing the individual modes is proportional to the stretching amplitude of the respective mode. The phase of the displacement is reflected by different colors.

## References

1. Vecera, P., *et al.* Degree of functionalisation dependence of individual Raman intensities in covalent graphene derivatives. *Sci. Rep.* (2016), <http://dx.doi.org/10.1038/srep45165>.
2. Ralph W.G. Wyckoff. *Crystal Structures Vol.1*, Second edition, Interscience Publishers, New York, 7-83 (1963).
3. Laurin, M. QVibeplot: A program to visualize molecular vibrations in two dimensions, *J. Chem. Educ.* **90**, 944–946 (2013).
